# Supplementary material for: Obesity status modifies the association between rs7556897T>C in the intergenic region SLC19A3-CCL20 and blood pressure in French children
Source: publisher site journal article supplement (doi:10.1515/cclm-2019-0292), 2020-04-01
Supplement: Supplementary file 1 [file cclm-2019-0292_suppl.docx]

Supplementary table 1. Biochemical biomarkers of the populations

|  | STANISLAS Family Study | | French Obesity Cases | |
| --- | --- | --- | --- | --- |
|  | Mean | Standard Deviation | Mean | Standard Deviation |
| Fasting glucose (mmol/l) | 4.9 | 0.4 | 5.0 | 0.8 |
| Cholesterol (mmol/l) | 4.7 | 0.8 | 4.4 | 0.8 |
| Triglycerides (mmol/l) | 0.7 | 0.4 | 1.1 | 0.6 |
| High-density lipoprotein (mmol/l) | 1.4 | 0.3 | 1.2 | 0.2 |
| Low-density lipoprotein (mmol/l) | 2.9 | 0.7 | 3.2 | 0.2 |
